# Supplementary material
Source: PubMed Central journal article supplement (PMC3202081)
Supplement: NIHMS310410-supplement-Supp_Table_S1.pdf [file NIHMS310410-supplement-Supp_Table_S1.pdf]

**Table of Studies Directly Testing the Activation of mGluR3 by NAAG in vitro\*\*\***

| Reference           | Re-purified NAAG | Glutamate Tested | NAAG Activated mGluR3 |
|---------------------|------------------|------------------|-----------------------|
| Wroblewska, 1993    | no               | yes              | mGluR3*               |
| Bischofberger, 1996 | no               | yes              | mGluR3*               |
| Wroblewska, 1997    | yes              | yes              | mGluR3                |
| Ghose, 1997         | yes              | yes              | mGluR3*               |
| Wroblewska, 1998    | yes              | yes              | mGluR3                |
| Lea, 2001           | yes              | yes              | mGluR3**              |
| Wroblewska, 2006    | yes              | yes              | mGluR3                |
| Chopra, 2009        | yes              | yes              | not mGluR3/K current  |
| Fricker, 2009       | yes              | yes              | not mGluR3/K current  |
| Adedoyin, 2010      | yes              | no               | mGluR3*               |

\* NAAG activated a group II mGluR, concluded to be mGluR3 since NAAG fails to activate mGluR2 in transfected cells. \*\* response to NAAG blocked by mGluR3 selective antagonist beta-NAAG. \*\*\*Does not include studies demonstrating NAAG activation of mGluR3 in vivo via application of NAAG peptidase inhibitors and blocked by group II mGluR antagonist LY341495 (reviewed in Neale et al., 2011)
